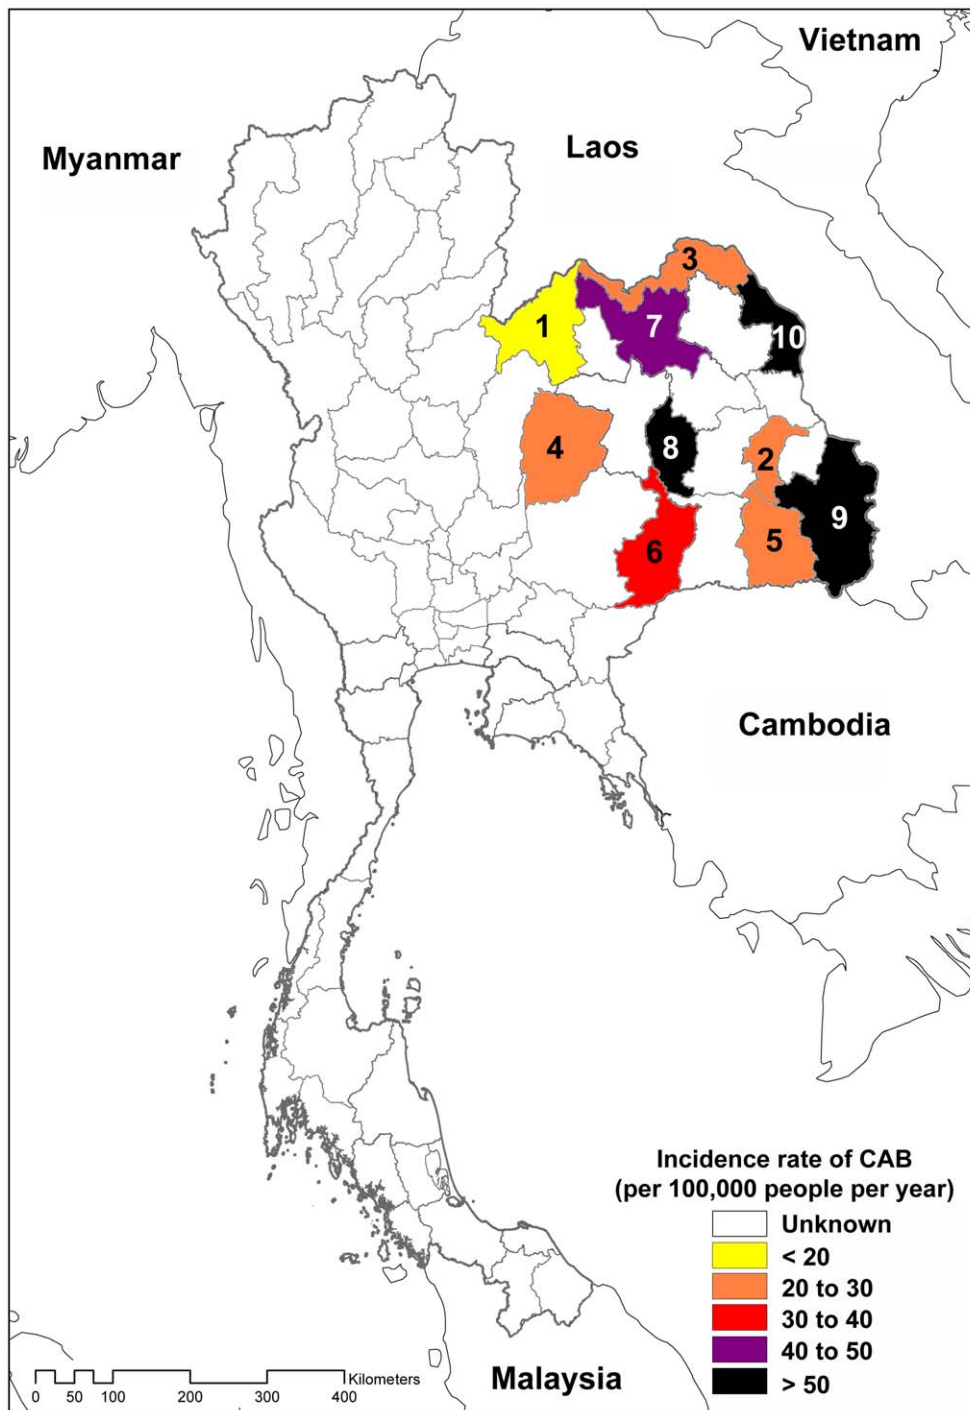

**Figure 2. Map of estimated incidence rates for community-acquired bacteremia (CAB), northeast Thailand, 2010.** Provinces are ordered by estimated incidence rates of CAB. Provincial codes: 1. Loei, 2. Yasothon, 3. Nong Khai, 4. Chaiyaphum, 5. Sisaket, 6. Buriram, 7. Udon Thani, 8. Mahasarakham, 9. Ubon Ratchathani, and 10. Nakhon Phanom.  
doi:10.1371/journal.pone.0054714.g002

very much lower than that observed in our study. By contrast, the incidence of CAB reported for children in Africa is extremely high, and includes 1,457 per 100,000 children per year in children <1 year old in Kilifi, Kenya between 1998–2002 [20], 1,730 per 100,000 children per year in children <1 year old in Manhica District, Mozambique, between 2001–2006 [21], and 1,009 per 100,000 children per year in children aged between 2–29 months

in Gambia, between 2000–2004 [22]. This compared with an incidence rate for CAB in children <1 year old of 83.5 per 100,000 people per year in our setting. The 30-day mortality associated with CAB of 37.5% in our setting is much higher than 30-day mortality of 13.0 to 19.0% reported in high-income countries [1,2,3,4,5], and the in-hospital mortality of 11.0% in Laos [19]. The 30-day mortality for children <1 year old with







26. Taylor DN, Levine MM, Kuppens L, Ivanoff B (1999) Why are typhoid vaccines not recommended for epidemic typhoid fever? *The Journal of infectious diseases* 180: 2089–2090.
27. Douglas MW, Lum G, Roy J, Fisher DA, Anstey NM, et al. (2004) Epidemiology of community-acquired and nosocomial bloodstream infections in tropical Australia: a 12-month prospective study. *Trop Med Int Health* 9: 795–804.
28. Dance DA, Wuthiekanun V, White NJ, Chaowagul W (1988) Antibiotic resistance in *Pseudomonas pseudomallei*. *Lancet* 1: 994–995.
29. Melzer M, Welch C (2012) Is *Escherichia coli* bacteraemia preventable? *The Lancet infectious diseases* 12: 103–104.
30. Underwood J, Klein JL, Newsholme W (2011) *Escherichia coli* bacteraemia: how preventable is it? *The Journal of hospital infection* 79: 364–365.
31. Savard P, Perl TM (2012) A call for action: managing the emergence of multidrug-resistant Enterobacteriaceae in the acute care settings. *Current opinion in infectious diseases* 25: 371–377.
32. Skrlin J, Bacic Vrcina V, Marusic S, Ciric-Crnec M, Mayer L (2011) Impact of ceftriaxone de-restriction on the occurrence of ESBL-positive bacterial strains and antibiotic consumption. *Journal of chemotherapy* 23: 341–344.
33. Guenther S, Ewers C, Wieler LH (2011) Extended-Spectrum Beta-Lactamases Producing *E. coli* in Wildlife, yet Another Form of Environmental Pollution? *Frontiers in microbiology* 2: 246.
